# Supplementary material
Source: publisher figshare collection journal article supplement (https://frontiersin.figshare.com/ndownloader/files/28706967)
Supplement: Supplementary file [file 28706967]

## *Supplementary Material*

**Table S1: Yeast Strains**

| <u>Strain</u> | <u>Genotype</u>                                                                                       | <u>Reference</u>         |
|---------------|-------------------------------------------------------------------------------------------------------|--------------------------|
| BY4733        | <i>MATa his3Δ200 trp1Δ63 leu2Δ0 met15Δ0 ura3Δ0</i>                                                    |                          |
| AA6           | <i>MATa his3Δ200 trp1Δ63 leu2Δ0 met15Δ0 ura3Δ0 HPC2 Without intron</i>                                | This study               |
| HG3           | <i>MATa his3Δ200 trp1Δ63 leu2Δ0 met15Δ0 ura3Δ0 APE2 Without intron</i>                                | Agarwal and Ansari, 2016 |
| AA7           | <i>MATa his3Δ200 trp1Δ63 leu2Δ0 met15Δ0 ura3Δ0 ASC1 Without intron</i>                                | Agarwal and Ansari, 2016 |
| NEA6          | <i>MATa his3Δ200 trp1Δ63 leu2Δ0 met15Δ0 ura3Δ0 IMD4 Without intron</i>                                | Agarwal and Ansari, 2016 |
| HG2           | <i>MATa his3Δ200 trp1Δ63 leu2Δ0 met15Δ0 ura3Δ0 YPL109C Without intron</i>                             | This study               |
| KMD9          | <i>MATa his3Δ200 trp1Δ63 leu2Δ0 met15Δ0 ura3Δ0 INO1::Act1 intron at 100 position</i>                  | This study               |
| AMR2          | <i>MATa his3Δ200 trp1Δ63 leu2Δ0 met15Δ0 ura3Δ0 INO1::Act1 intron at 500 position</i>                  | This study               |
| KMD10         | <i>MATa his3Δ200 trp1Δ63 leu2Δ0 met15Δ0 ura3Δ0 INO1::Act1 intron at 800 position</i>                  | This study               |
| KMD11         | <i>MATa his3Δ200 trp1Δ63 leu2Δ0 met15Δ0 ura3Δ0 INO1::Act1 intron at 1400 position</i>                 | This study               |
| KMD18         | <i>MATa his3Δ200 trp1Δ63 leu2Δ0 met15Δ0 ura3Δ0 INO1::Act1 intron at TGA+10 position</i>               | This study               |
| NEA11         | <i>MATa his3Δ200 trp1Δ63 leu2Δ0 met15Δ0 ura3Δ0 IMD4::Act1 intron at 461 position</i>                  | This study               |
| AG1           | <i>MATa his3Δ200 trp1Δ63 leu2Δ0 met15Δ0 ura3Δ0 IMD4::Act1 intron at 750 position</i>                  | This study               |
| KMD6          | <i>MATa his3Δ200 trp1Δ63 leu2Δ0 met15Δ0 ura3Δ0 IMD4::Act1 intron at TGA+20 position</i>               | This study               |
| KMD13         | <i>MATa his3Δ200 trp1Δ63 leu2Δ0 met15Δ0 ura3Δ0 IMD4 Without intron, SUA7-HA::HIS</i>                  | This study               |
| AG7           | <i>MATa his3Δ200 trp1Δ63 leu2Δ0 met15Δ0 ura3Δ0 IMD4::Act1 intron at 461 position, SUA7-HA::HIS</i>    | This study               |
| AG5           | <i>MATa his3Δ200 trp1Δ63 leu2Δ0 met15Δ0 ura3Δ0 IMD4::Act1 intron at 750 position, SUA7-HA::HIS</i>    | This study               |
| KMD14         | <i>MATa his3Δ200 trp1Δ63 leu2Δ0 met15Δ0 ura3Δ0 IMD4::Act1 intron at TGA+20 position, SUA7-HA::HIS</i> | This study               |

|       |                                                                                                                                                                                                   |            |
|-------|---------------------------------------------------------------------------------------------------------------------------------------------------------------------------------------------------|------------|
| NEA7  | <i>MATa his3<math>\Delta</math>200 trp1<math>\Delta</math>63 leu2<math>\Delta</math>0 met15<math>\Delta</math>0 ura3<math>\Delta</math>0 IMD4 Without intron, CCL1-TAP::URA3</i>                  | This study |
| SAM30 | <i>MATa his3<math>\Delta</math>200 trp1<math>\Delta</math>63 leu2<math>\Delta</math>0 met15<math>\Delta</math>0 ura3<math>\Delta</math>0 IMD4::Act1 intron at 461 position, CCL1-TAP::URA3</i>    | This study |
| AG6   | <i>MATa his3<math>\Delta</math>200 trp1<math>\Delta</math>63 leu2<math>\Delta</math>0 met15<math>\Delta</math>0 ura3<math>\Delta</math>0 IMD4::Act1 intron at 750 position, CCL1-HA::HIS</i>      | This study |
| KMD16 | <i>MATa his3<math>\Delta</math>200 trp1<math>\Delta</math>63 leu2<math>\Delta</math>0 met15<math>\Delta</math>0 ura3<math>\Delta</math>0 IMD4::Act1 intron at TGA+20 position, CCL1-TAP::URA3</i> | This study |

**Table S2: Primers/probes used in RT-PCR, ChIP, CCC and TRO**

ChIP Primers

| Primer Name: | Sequence:                  |
|--------------|----------------------------|
| 5' IMD4- P   | ATGATAGACTTGAGGGACGCAC     |
| 3' IMD4- P4  | CAGCATCTCGAAGAGCAAAAA      |
| 5' IMD4- P2  | GCCATATAAATATCAGTTGAGAATCC |
| 3' IMD4- P2  | GTATGTCTTCAAATGTTCTAAAGCC  |
| 5' IMD4- CCC | TGGATTACAAAAAGGCTTTAGAAC   |
| 3' IMD4- CCC | CAGCATCTCGAAGAGCAAAAA      |
| 5' IMD4- T   | GATTCTGTGCATTTGAGGAGC      |
| 3' IMD4- T   | GGTGTAAGGGTTTAGATGAAGC     |

YPL109 Primers

| Primer Name:    | Sequence:                                                                   |
|-----------------|-----------------------------------------------------------------------------|
| 5' YPL109C- A1  | TTTTCATAAAATACCTATAAG                                                       |
| 3' YPL109C- A1  | CTGAAATTTCTAAAAACCT                                                         |
| 5' YPL109C- P1  | CTGTGAGGGTTTGATATTGATGAG                                                    |
| 3' YPL109C- T1  | TGCATCTTTTATAATTGCGACTTCC                                                   |
| 5' YPL109C- F1  | CCTCTTCTCCTATTATACCCCATAT                                                   |
| 3' YPL109C- R1  | CGTTACTATGCAATTTACCCAAC                                                     |
| 5' YPL109C- pRS | TATCAAACCCTCACAGAATAGAGATAAAGAACATCAGAACC<br>ATCTGGGCAGCGGCATCAGAGCAGATTG   |
| 3' YPL109C- pRS | GCGAACACGTGGAAGTCGCAATTATAAAAGATGCATAAAAA<br>GAAAGAATACTGTGCGGTATTTACACACCG |

INO1 Primers

| Primer Name:     | Sequence:                                                                  |
|------------------|----------------------------------------------------------------------------|
| 5' INO-INT-up100 | CAAGTGCACGTACAAGGACAACGAGCTGCTCACCAAGTA<br>CAGCTACGAAAGTATGTTCTAGCGCTTGCAC |

|                     |                                                                                           |
|---------------------|-------------------------------------------------------------------------------------------|
| 3' INO-INT-down100  | AGTGGGCGTTACATCGAAGCGGCCACTAGCTGTCTTCGT<br>AACTACAGCATCTAAACATATAATATAGCAACAAAAAGAAT<br>G |
| 5' INO-INT-up500    | AACGCAGATCTATACGAAGCTATGCAGAGAAGTCAAGTTCT<br>CGAATATGAGTATGTTCTAGCGCTTGAC                 |
| 3' INO-INT-down500  | AAGGAAGAGGCTTCACCAAGGACATCTTCGCCTTCAAGCGT<br>TGTTGCAGACTAAACATATAATATAGCAACAAAAAGAATG     |
| 5' INO-INT-up800    | GTAGAAGTATCTCCTGGTGTTAATGACACCATGGAAAACC<br>TCTTGCAGTCGTATGTTCTAGCGCTTGAC                 |
| 3' INO-INT-down800  | CTGCTGCAAAGATCGTGGAAGGAGCAATCTCTTCATGGTC<br>ATTCTTAATACTAAACATATAATATAGCAACAAAAAGAATG     |
| 5' INO-INT-up1400   | GTCATGACTGAGTTTTGTACAAGAGTGTCTATAAGAAGG<br>TGGACCCAGTGTATGTTCTAGCGCTTGAC                  |
| 3' INO-INT-down1400 | AGAAGGTAAAACCTGGATAAAAGTTCTCGAATTTGCCAGC<br>ATCTTCTTTACTAAACATATAATATAGCAACAAAAAGAATG     |
| 5' INO-INT-TGA+10   | GCCTTCTCAAACGAACTAAGATTTGAAGAGAGATTGTTGTA<br>ATCTCATTGTATGTTT                             |
| 3' INO-INT-TGA+10   | AATGTCTTGTTTTTTTATAGGTAGGCGGAAAAAGAAAAAGA<br>GAGTCGTTGCTAAACA                             |
| 5' INO1 A1          | GATATCCAGAATTTCAAAGAAGAAAAC                                                               |
| 3' INO1 A2          | TATTCTGCGGTGAACCATTAATATAG                                                                |
| 5' INO1 S1          | CAGAAAAGCTGATGAATGACTCTG                                                                  |
| 3' INO1 S2          | TTGATGGTTGGAGTTGTGACCG                                                                    |
| 3' 18S              | GACGGAGTTTCACAAGATTACC                                                                    |
| 3' Oligo dT         | TTTTTTTTTTTTTTTTTTTTTTTTTTTTTTTT                                                          |
| 5' 18S F            | GGAATAATAGAATAGGACGTTTGG                                                                  |
| 3' 18S R            | GTAAAGGTCTCGTTCGTTATCG                                                                    |
| 5' INO1 F2          | TGCTCACCAAGTACAG                                                                          |
| 3' INO1 R2          | GTAGTTTGGTTGCTTAACGCC                                                                     |
| 5' INO1 F3          | GGCGTTAAGCAACCAAACACTAC                                                                   |
| 3' INO1 R3          | CCGACGGGCTTCATATATTTG                                                                     |
| 5' INO1 F4          | GGCGTTAAGCAACCAAACACTAC                                                                   |
| 3' INO1 R4          | CCGACGGGCTTCATATATTTG                                                                     |
| 5' INO1 F5          | GTATTAAACCGGTCTCCATTGC                                                                    |
| 3' INO1 R5          | CAACAATCTCTCTTCGAATCTTAG                                                                  |
| 5' INO1 F6          | GTATTAAACCGGTCTCCATTGC                                                                    |
| 3' INO1 R6          | ATAGGTAGGCGGAAAAAG                                                                        |

#### IMD4 Primers

| Primer Name:        | Sequence:                                                                 |
|---------------------|---------------------------------------------------------------------------|
| 5' IMD4 ACT1<br>461 | AGTTAAGGTTATGAAGAGAAAGTTTGGTTTCTCTGGCTTC<br>CCAGTTACTGGTATGTTCTAGCGCTTGAC |

|                        |                                                                                       |
|------------------------|---------------------------------------------------------------------------------------|
| 3' IMD4 ACT1<br>461    | ATCACGAGAGGTGACTAACCCAACTAACTTACCTGGACAC<br>TTACCGTCTTCTAAACATATAATATAGCAACAAAAAGAATG |
| 5' IMD4 ACT1<br>750    | TTCTAAATCCGCCACCACCAAGCAATTGCTATGTGGTGCT<br>GCAATTGGTACTATCGAAGCTGATAAGGAAAGATTAAGAC  |
| 3' IMD4 ACT1<br>750    | TTTGATCATGTTCAATTGGAAAACAGAGTTACCTTGAGAG<br>GAATCTAAGATAACAACATCCAAACCTGCTTCGACTAATA  |
| 5' IMD4 ACT1<br>TGA+20 | CACTCCTATGAAAAACGTCTATACAATTGAGTAAGCATCCA<br>TAGATATTTGTATGTTCTAGCGCTTGCAC            |
| 3' IMD4 ACT1<br>TGA+20 | AGTTTTTGTGATCTCTATGAAGGTATATTTATATGCAAAAAT<br>AACTTTTCTAAACATATAATATAGCAACAAAAAGAATG  |
| 5' IMD4- A1            | TGTTGTCAAGAGCGGATTTG                                                                  |
| 3' IMD4- A2            | AATCTGGGAAAGTTTCTTTAATCC                                                              |
| 3' IMD4- UP1           | GATTCAAATCATGCTTGGCTC                                                                 |
| 5' IMD4- UP            | CGCATTTTTTTCATCTCTTTTTC                                                               |
| 3' IMD4- UP            | TTTGTTAGGTTTCTTCAAAGCTATG                                                             |
| 5' IMD4- P1            | AGAGTTTTTCACATTAGGGCTGC                                                               |
| 3' IMD4- T1            | CTTATTGAAGTATGTACAGTGGAATAG                                                           |
| 5' IMD4- F1            | TGGATTACAAAAAGGCTTTAGAAC                                                              |
| 3' IMD4- R1            | CTTCAGTGACTGTGTCCATAGGAG                                                              |
| 5' IMD4- J             | TGGTATGTTAGCTGGTAC                                                                    |
| 3' IMD4- T             | GGTGTAAGGGTTTAGATGAA                                                                  |
| 3' IMD4- T2            | CGAACTGAAAAACGAAAATAAGAA                                                              |
| 3' IMD4- T3            | CACAATTCAGGCGTGTTGC                                                                   |
| 3' IMD4- T4            | TCGCCTAAACATGCTTCC                                                                    |
| 3' IMD4- T5            | TGAAGATGAGCTGGAAAA                                                                    |
| 5' IMD4- ACT1          | CATGTACTAACATCGATTGCTTC                                                               |
| 5' IMD4 FP             | AGGAATTGATGGACTCCACAA                                                                 |
| 3' IMD4 RP             | GGTTTGTTTTAGGATTTCATTACC                                                              |
| 5' IMD4 FM             | TGTTGTCAAGAGCGGATTTG                                                                  |
| 3' IMD4 RM             | AATCTGGGAAAGTTTCTTTAATCC                                                              |
| 5' IMD4 FT             | TGGTATGTTAGCTGGTAC                                                                    |
| 3' IMD4 RT             | AAGAATGATAGCAAATAGAGAAAGC                                                             |

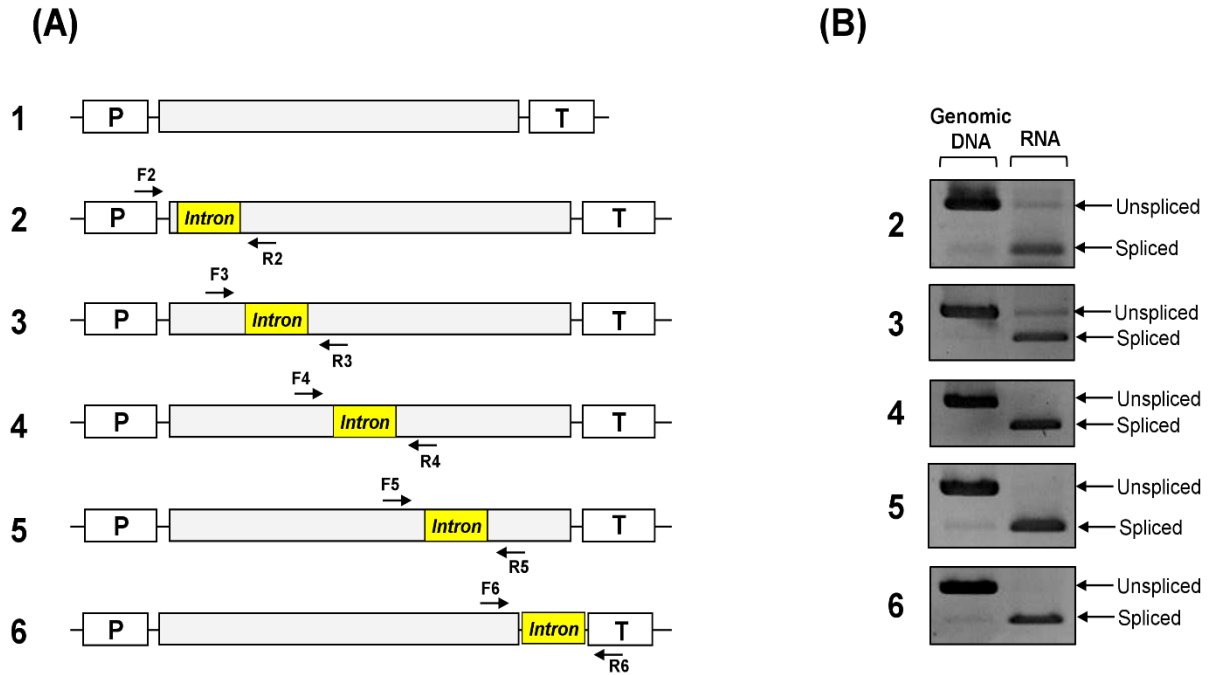

**Supplementary Figure 1.** The *ACT1* intron at different positions in the *INO1* gene is spliced efficiently. **(A)** Schematic depiction of *INO1* gene with the *ACT1* intron at five different positions within the gene. Arrows indicate the position of primers used in RT-PCR analyses. **(B)** RT-PCR analysis of *INO1* mRNA with the intron at five different positions. Genomic DNA PCR indicate the position of unspliced transcripts. The expected positions of spliced and unspliced transcripts obtained by RT-PCR approach for every construct is indicated.

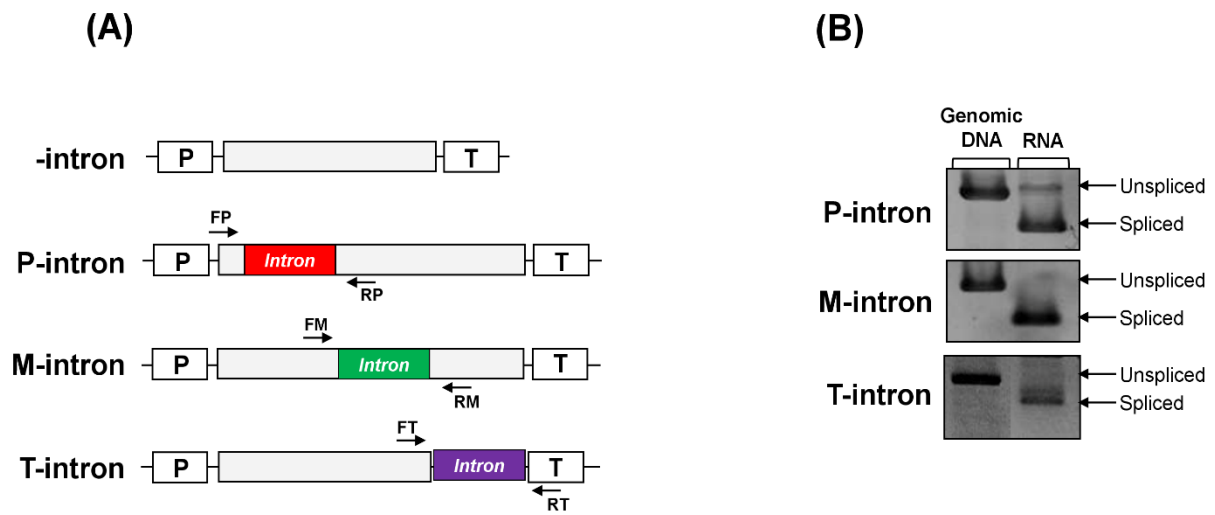

**Supplementary Figure 2.** The *ACT1* intron at different positions in the *IMD4* gene is spliced efficiently. **(A)** Schematic depiction of *IMD4* gene with the *ACT1* intron at three different positions within the gene. Arrows indicate the position of primers used in RT-PCR analyses. **(B)** RT-PCR analysis of *IMD4* mRNA with the intron at three different positions. Genomic DNA PCR indicate the position of unspliced transcripts. The expected positions of spliced and unspliced transcripts obtained by RT-PCR approach for every construct is indicated.
